# Supplementary material
Source: Springer Nature journal article supplement (https://www.springermedizin.de/resource/supplementary/12968_2010_976_MOESM4_ESM.pdf/9580080)

Signal Difference (a.u.)

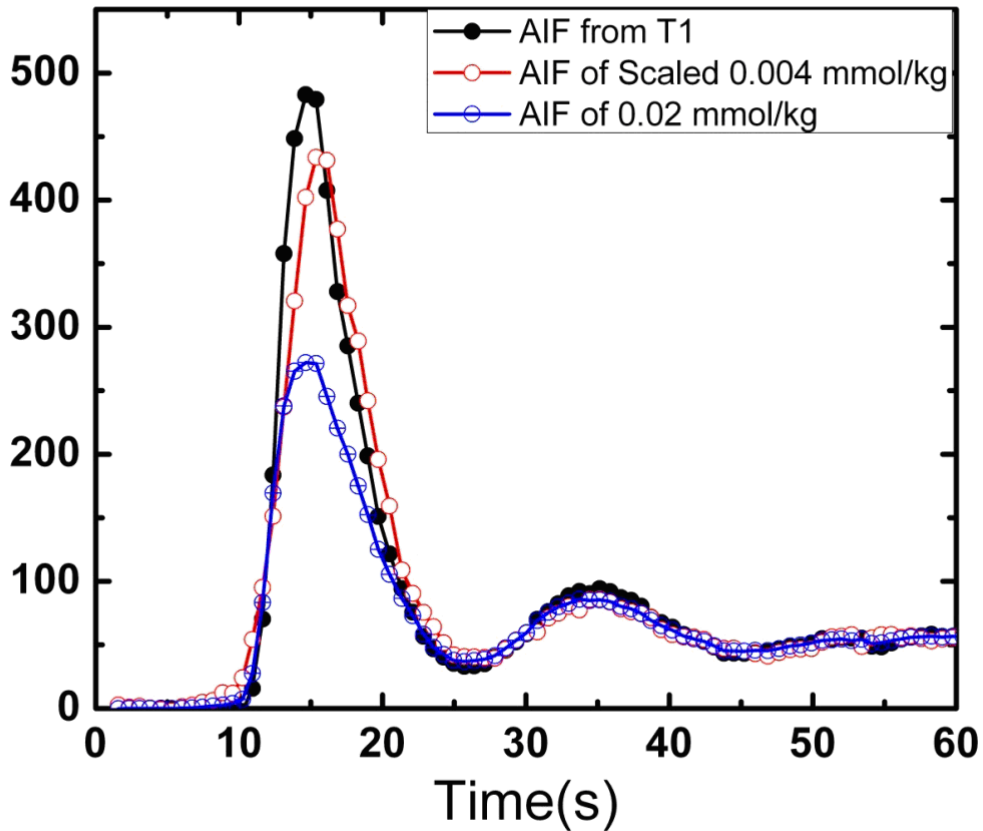

Supplement: MOESM4 [file 9580080]
